# Supplementary material for: A novel fluorene based “turn on” fluorescent sensor for the determination of zinc and cadmium: experimental and theoretical studies along with live cell imaging
Source: Royal Society of Chemistry journal article supplement (doi:10.1039/c6nj01682k), 2016-01-01
Supplement: c6nj01682k1.pdf [file c6nj01682k1.pdf]

## **Supporting Information**

### **A novel fluorene based “Turn On” fluorescent sensor for the determination of Zinc and Cadmium: Experimental and Theoretical Studies along with live Cell imaging.**

Sohini Basu Roy<sup>a</sup>, Jesmin Mondal<sup>b</sup>, Anisur Rahman Khuda-Bukhsh<sup>b</sup>  
Kajal Krishna Rajak<sup>a\*</sup>

<sup>a</sup>Inorganic Chemistry Section, Department of Chemistry, Jadavpur University, Kolkata, 700 032, India. E-mail: [kajalrajak@hotmail.com](mailto:kajalrajak@hotmail.com), [kkrajak@chemistry.jdvu.ac.in](mailto:kkrajak@chemistry.jdvu.ac.in)

<sup>b</sup>Cytogenetics and Molecular Biology Laboratory, Department of Zoology, University of Kalyani, Kalyani-741235, West Bengal, India

## **CONTENTS**

- 1) *<sup>1</sup>H NMR spectrum (S1) and Mass spectrum (S2) of compound 2 Hydroxy Fluorene.....*
- 2) *<sup>1</sup>H NMR spectrum (S3) and Mass spectrum (S4) of compound 3Nitro-2Hydroxy Fluorene.....*
- 3) *<sup>1</sup>H NMR spectrum (S5) and Mass spectrum (S6) of compound 3Amino-2Hydroxy Fluorene.....*
- 4) *<sup>1</sup>H NMR spectrum (S7) , <sup>13</sup>C NMR (S8-9) and Mass spectrum (S10) of final compound HAFPA .....*
- 5) *<sup>1</sup>H NMR spectrum (S11) and Mass spectrum (S12) of compound HAFPA-Zn Complex.....*
- 6) *Mass spectrum (S13) of compound HAFPA-Cd Complex.....*
- 7) *FT-IR spectra (S14) of the HAFPA, HAFPA-Zn and HAFPA-Cd complex.*
- 8) *Determination of Association Constant (K<sub>a</sub>): a) UV-vis method(S15) b) Fluorescence method of HAFPA with Zn<sup>2+</sup> and Cd<sup>2+</sup> (S16).*
- 9) *Determination of Limit of Detection: a) Fluorescence method of HAFPA with Zn<sup>2+</sup> and Cd<sup>2+</sup> (S17).*
- 10) *Jobs Plot by Absorbance Method (S18).*

- 11) *Determination of the fluorescence quantum yield (Table-S1).*
- 12) *UV and Fluorescence spectra of the HAFPA ligand with the gradual addition of Cu<sup>2+</sup> ion (S19).*
- 13) *a)Behaviour of the ligand in different Solvent, b)pH analysis of the ligand, Zn complex, Cd complex (S20).*
- 14) *Absorption spectra of the free ligand, ligand complex and ligand complex with anion (S21).*
- 15) *Association Constant of the Zn receptor and Cd receptor in presence of EDTA and Sulphide ion (S22).*
- 16) *Detection Limit of the Zn receptor and Cd receptor in presence of EDTA and Sulphide ion (S23).*
- 17) *Competetion of the Zn receptor and Cd receptor with different anion (S24).*
- 18) *Determination of the first order rate constant (S25).*
- 19) *Analysis of the logic gate in Bar Diagram (S26).*
- 18) *Computational Study (Table-S2) and (Table-S3).*
- 19) *Theoretical Spectrum (S27) and (S28).*
- 20) *NMR Study over a longer period of time.*

### $^1\text{H}$ NMR spectrum of Compound Hydroxy Fluorene:

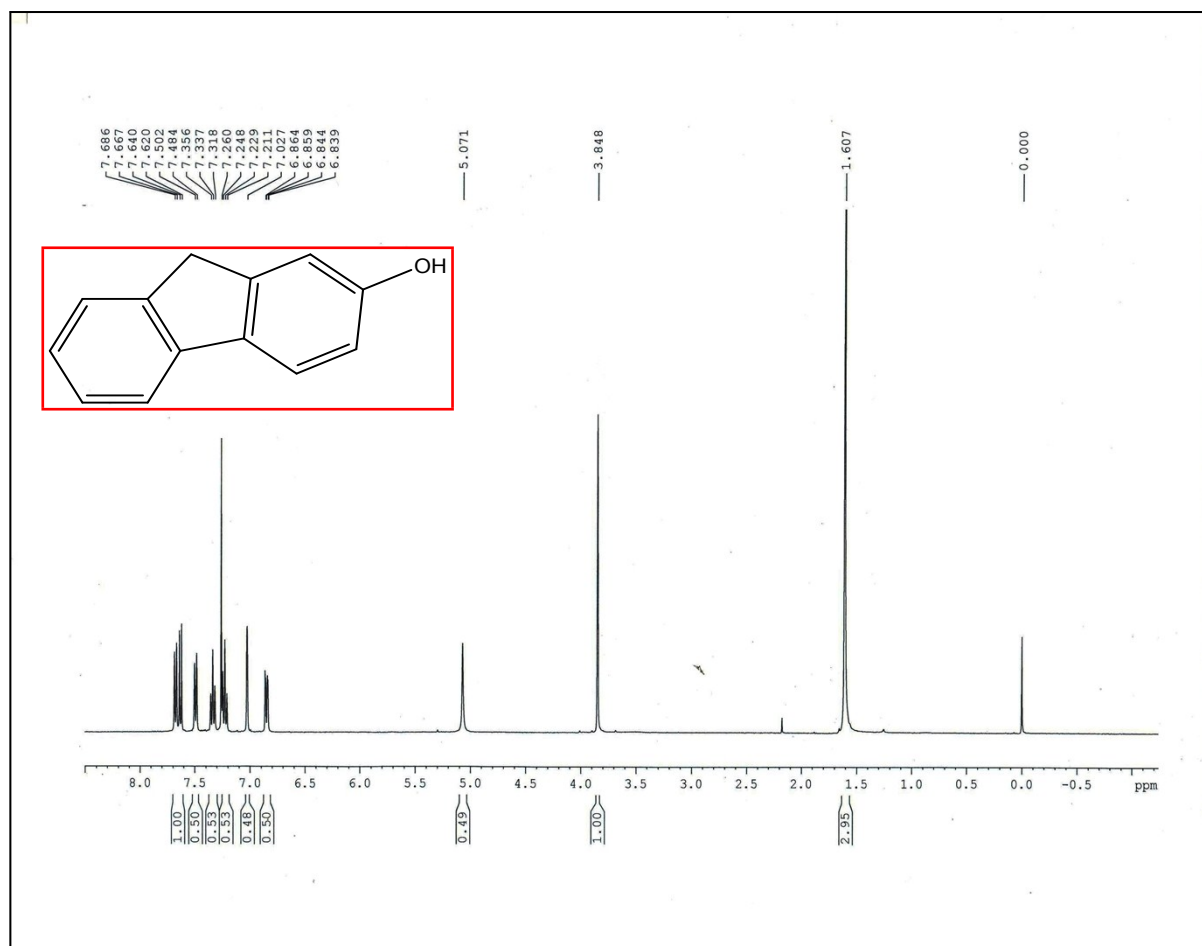

**Fig S1.**  $^1\text{H}$  NMR spectrum of Hydroxy Fluorene.

## Mass spectrum of compound Hydroxy Fluorene:

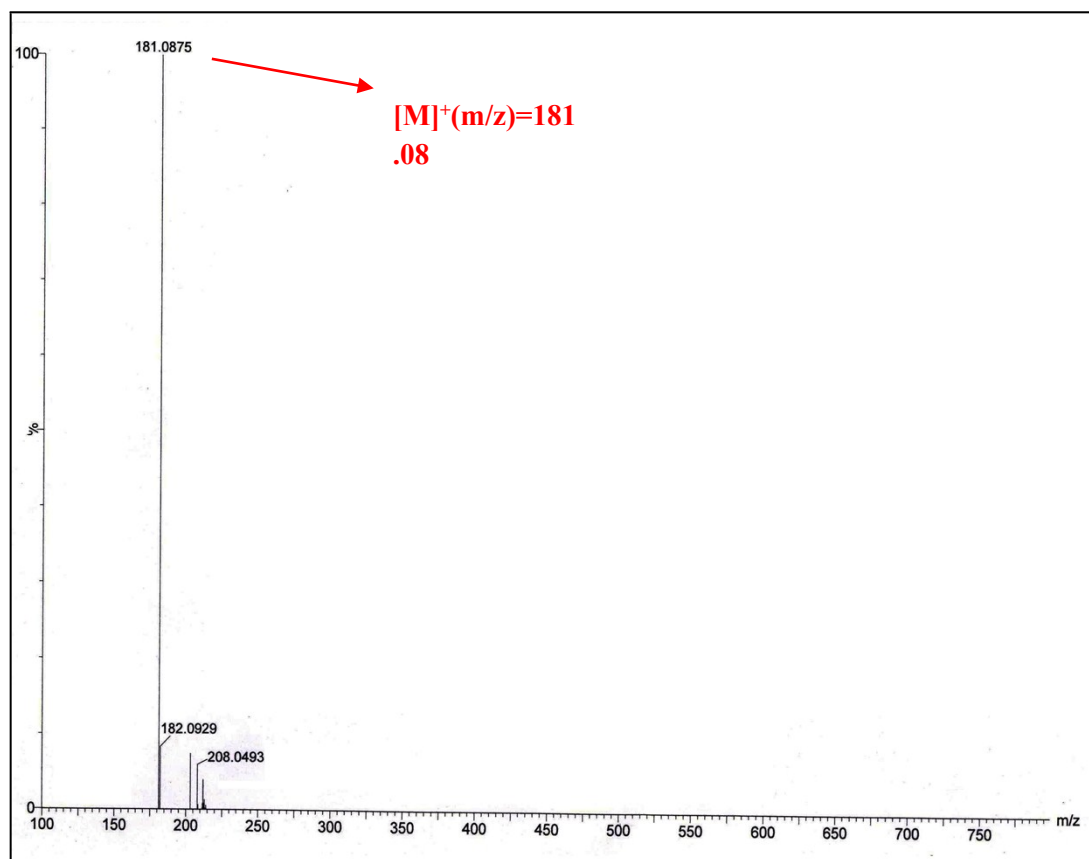

**Fig S2.** Mass spectrum of Hydroxy Fluorene.

## <sup>1</sup>H NMR spectrum of Compound 3 nitro-2Hydroxy Fluorene

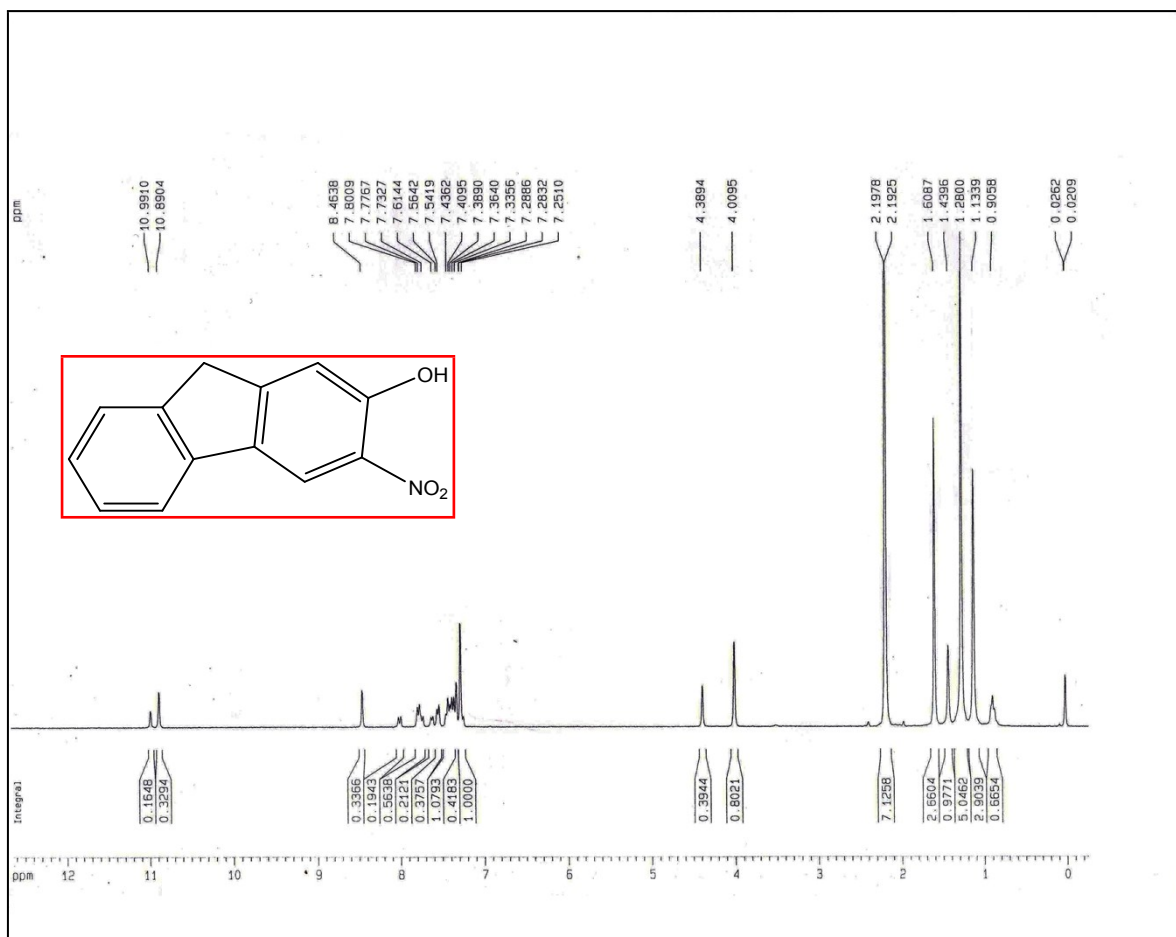

**FigS3.** <sup>1</sup>H NMR spectrum of 3-nitro 2-Hydroxy Fluorene.

## Mass spectrum of compound 3 nitro-2Hydroxy Fluorene

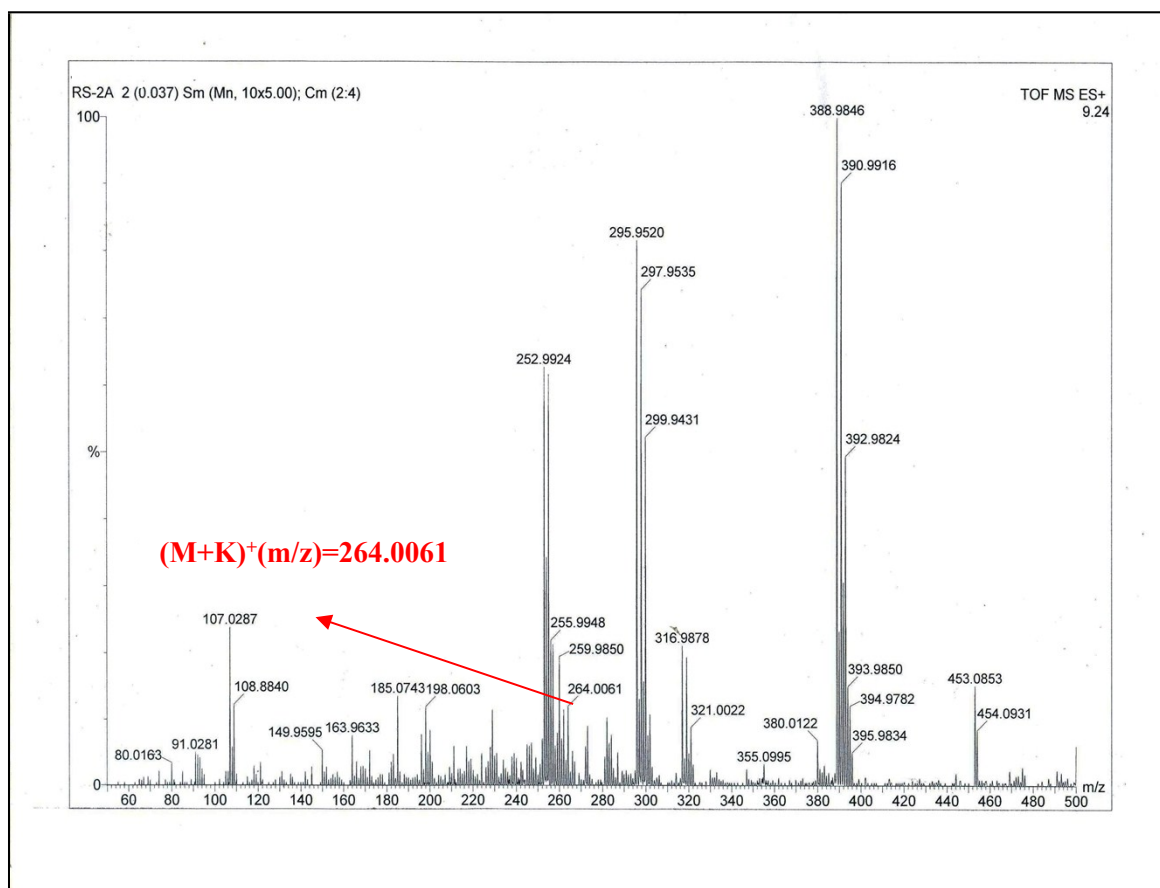

**FigS4.** Mass spectrum of 3-nitro 2-Hydroxy Fluorene.

## <sup>1</sup>H NMR spectrum of Compound 3 amino-2Hydroxy Fluorene

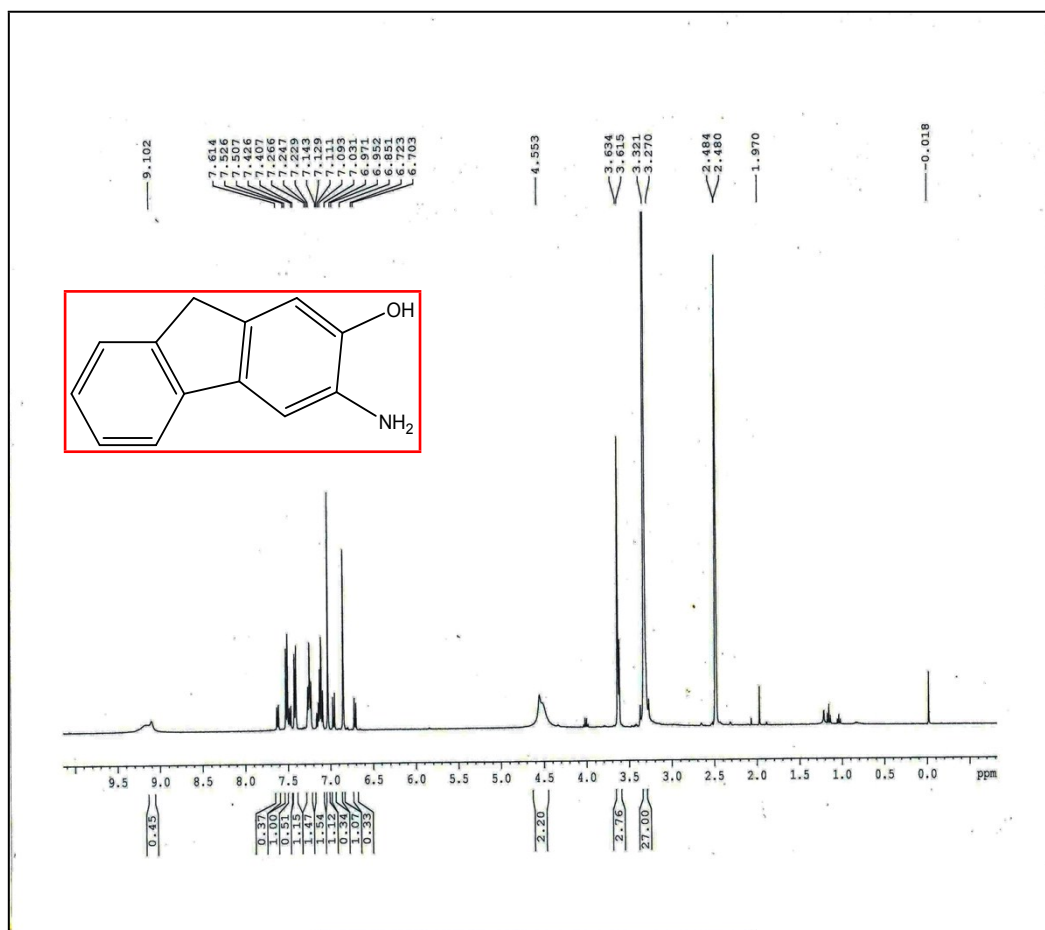

**FigS5.** <sup>1</sup>H NMR spectrum of 3-amino 2-Hydroxy Fluorene.

## Mass spectrum of compound 3 amino-2Hydroxy Fluorene

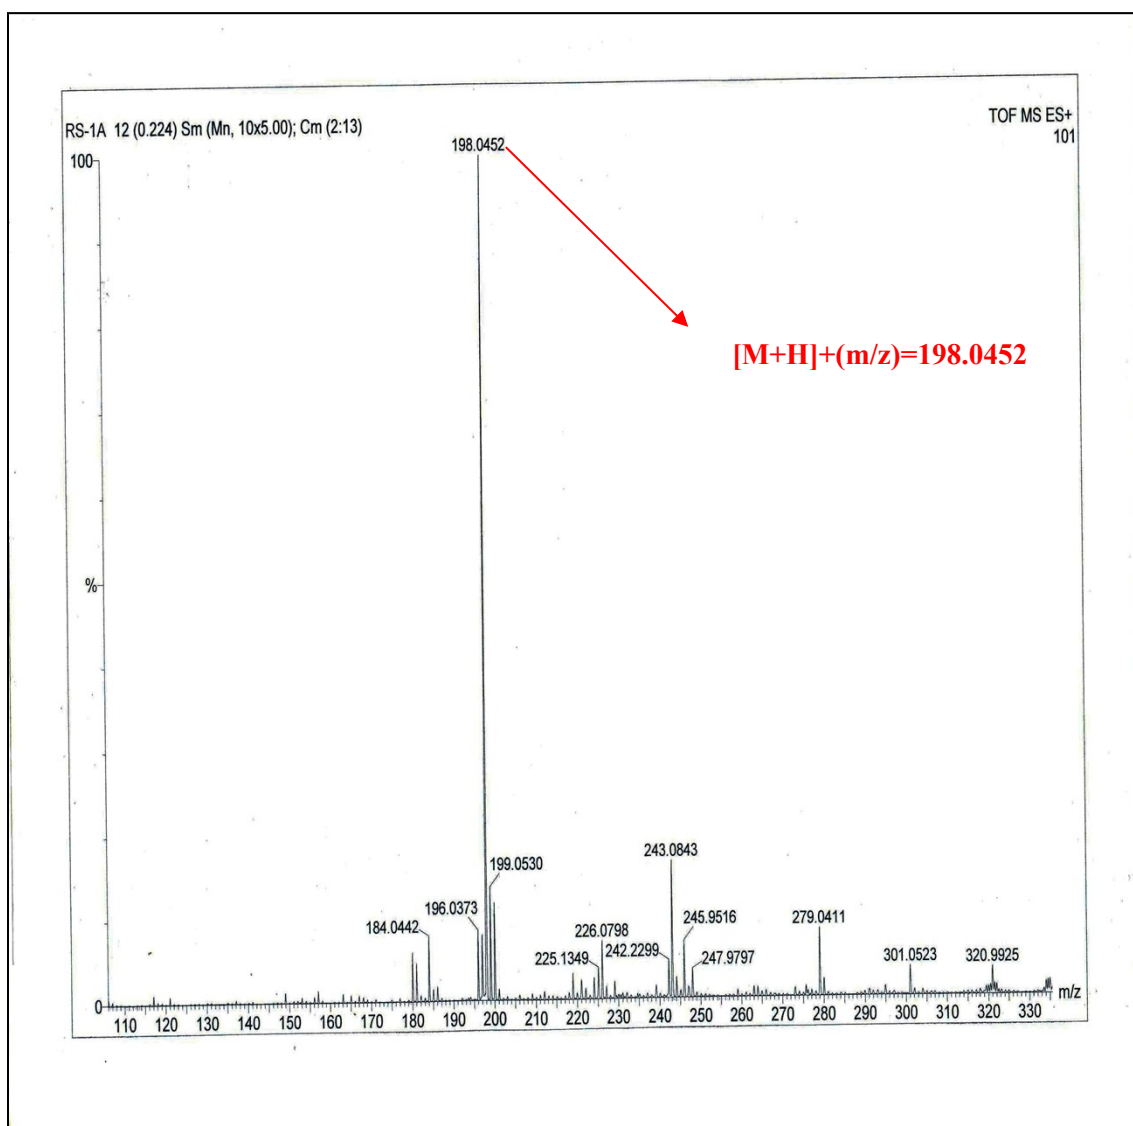

**Fig S6.** Mass spectrum of 3-amino 2-Hydroxy Fluorene.



## <sup>1</sup>H NMR spectrum of Compound HAFPA:

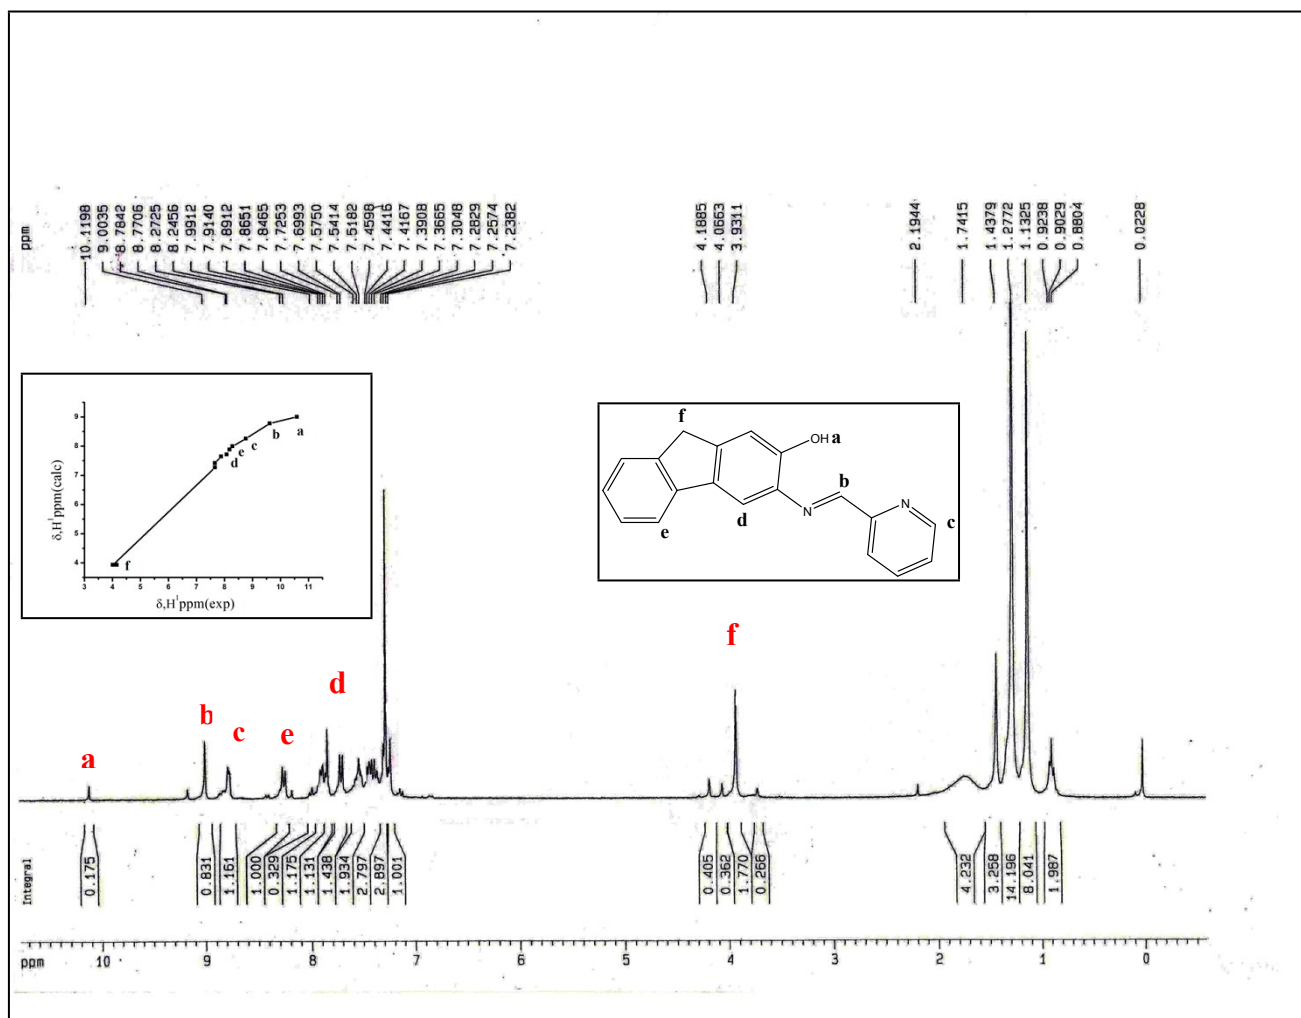

**FigS7.** <sup>1</sup>H NMR spectrum of HAFPA. The Linear correlation between the experimental and Calculated <sup>1</sup>H NMR chemical shifts of HAFPA (inset).

## $^{13}\text{C}$ NMR spectrum of Compound HAFPA

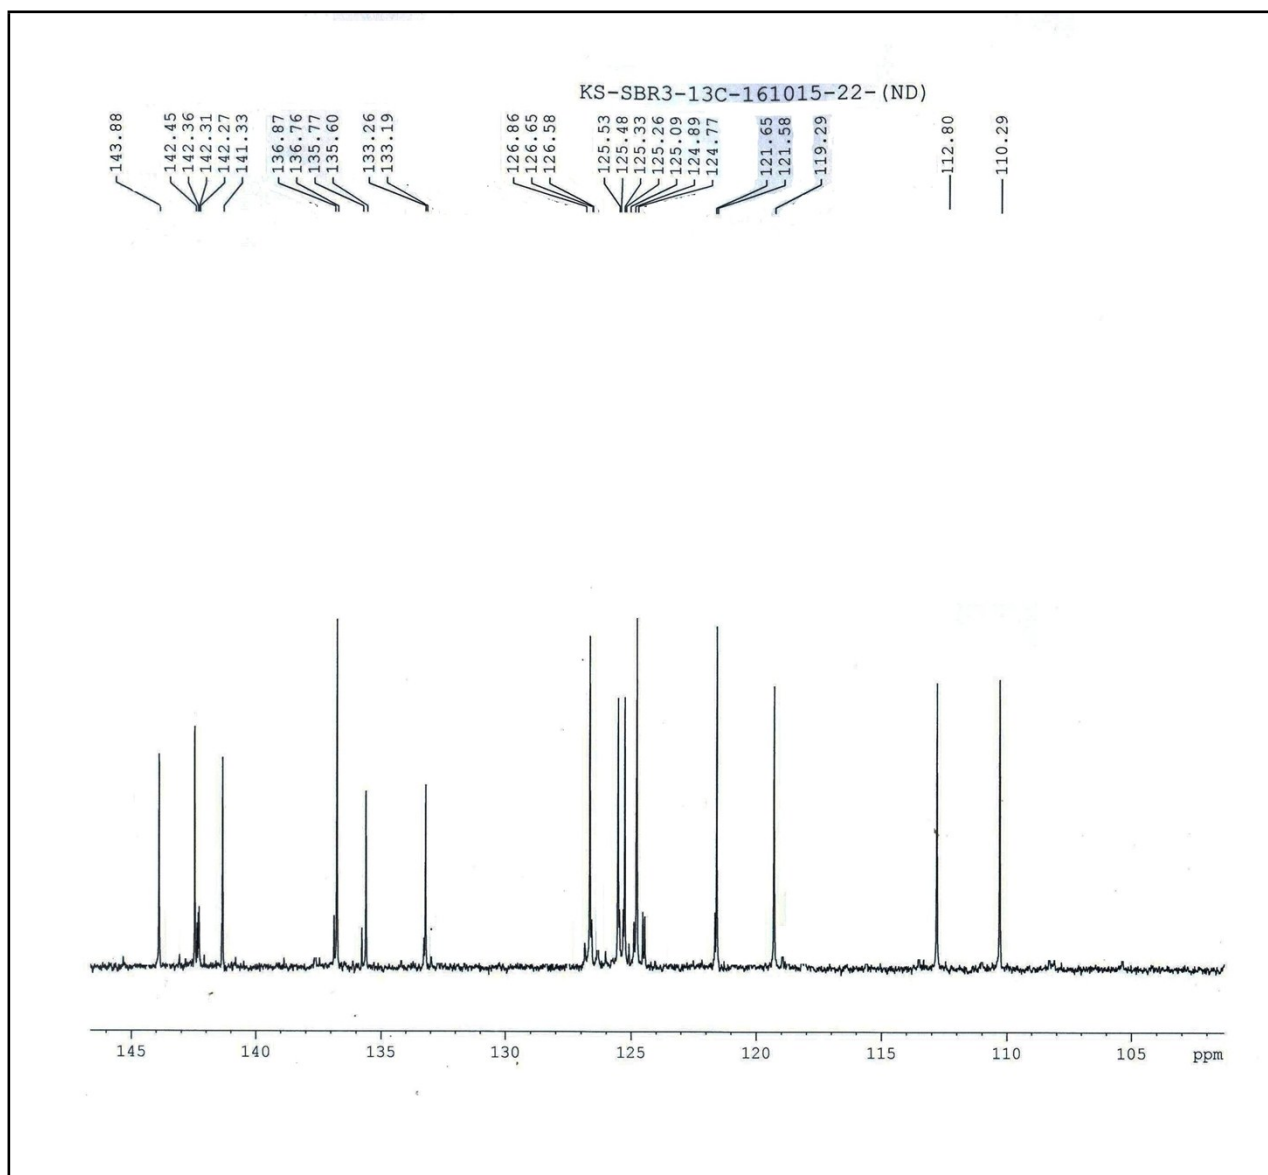

**FigS8.**  $^{13}\text{C}$  NMR spectrum of Compound HAFPA.

## Expanded $^{13}\text{C}$ NMR spectrum of Compound HAFPA

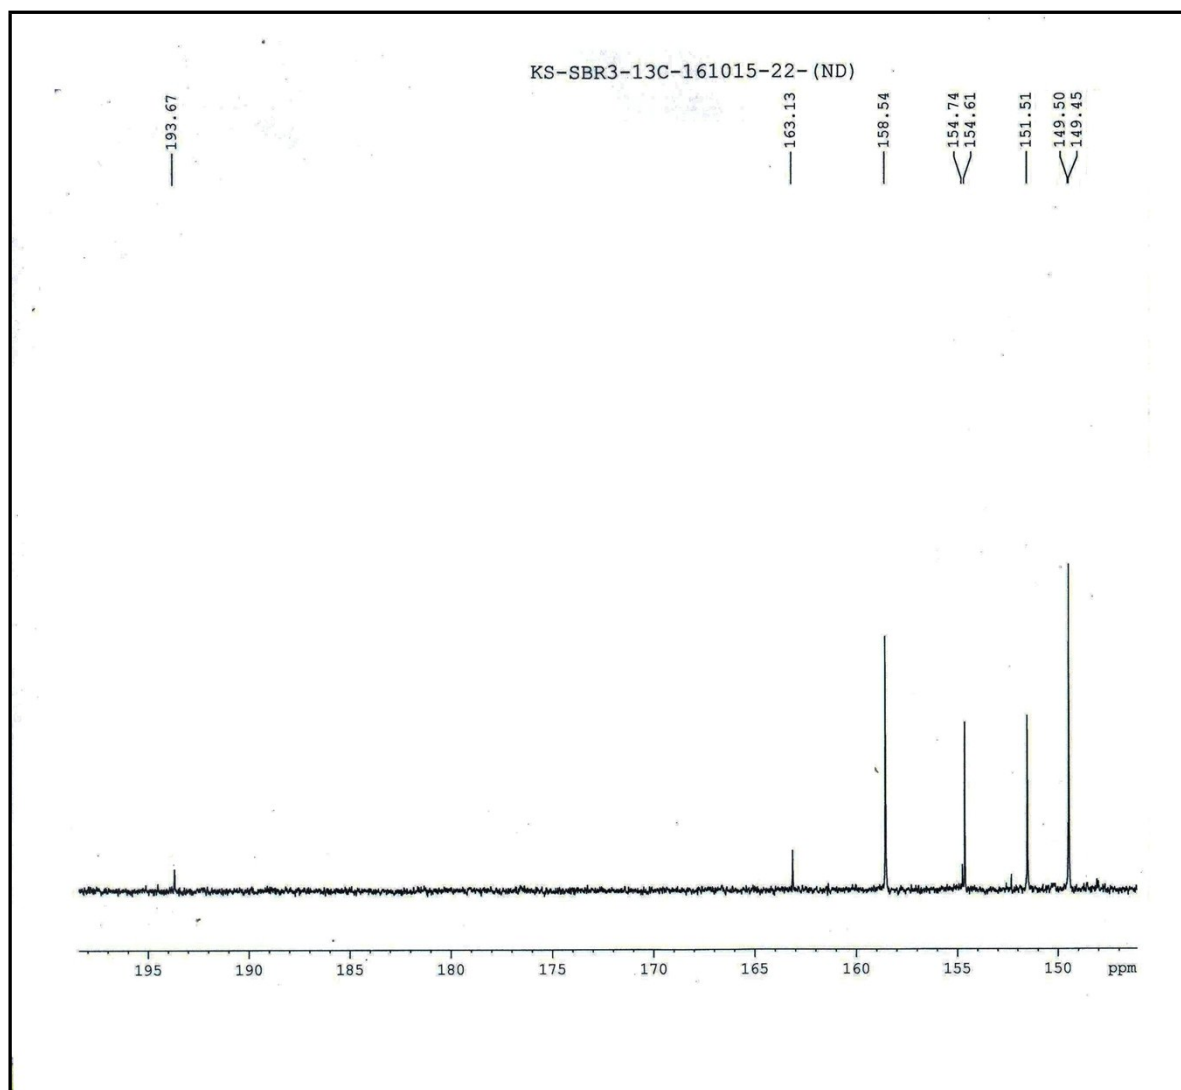

**FigS9.** Expanded  $^{13}\text{C}$  NMR spectrum of HAFPA.

## Mass spectrum of compound HAFPA:

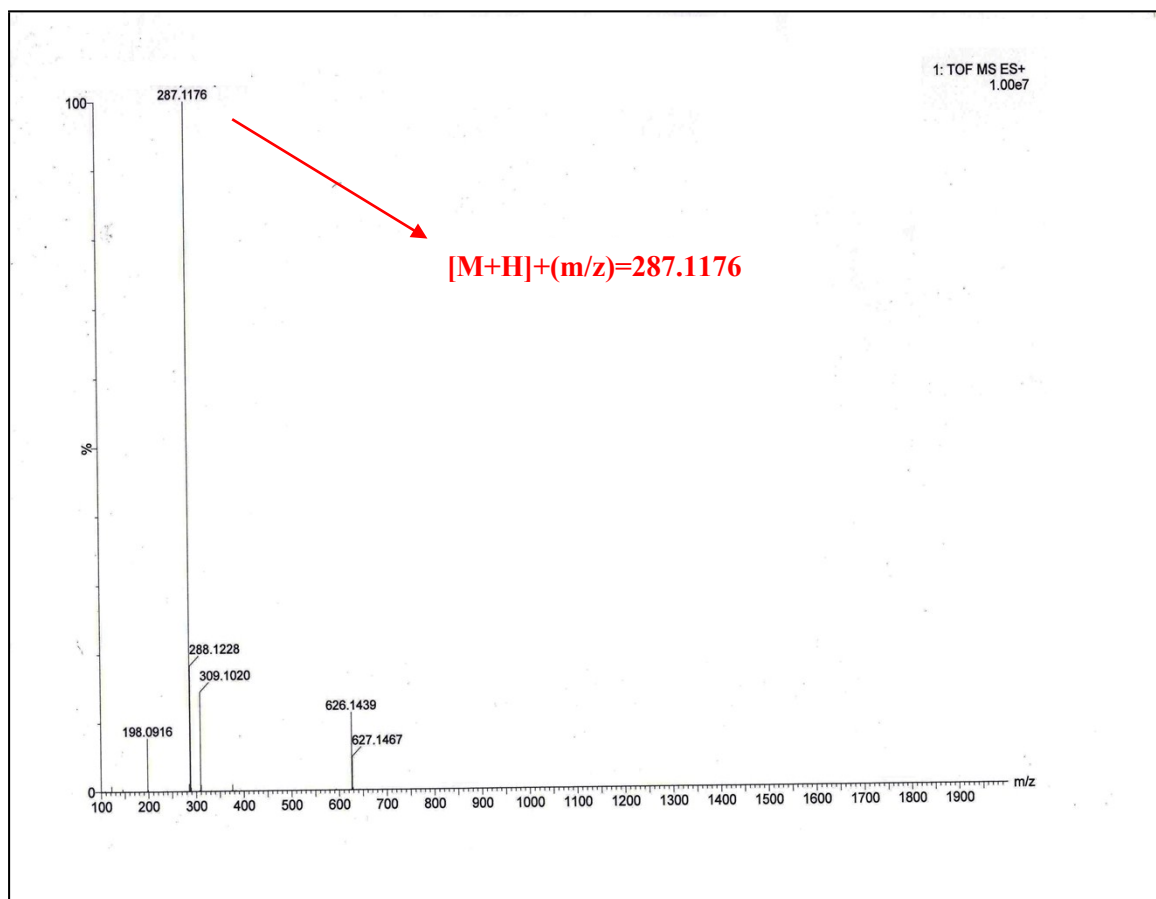

**FigS10.** Mass spectrum of HAFPA.

## <sup>1</sup>H NMR spectrum of HAFPA-Zn Complex:

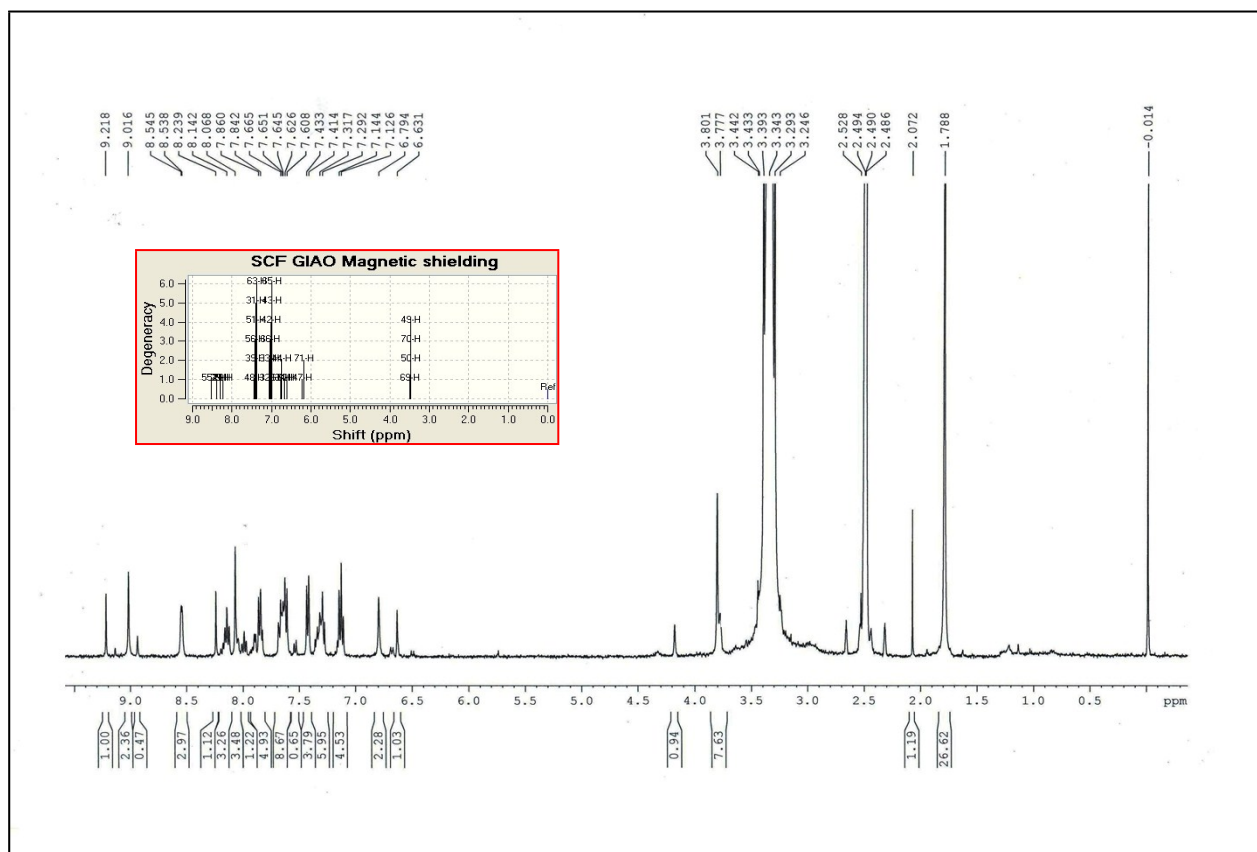

**Fig S11.** <sup>1</sup>H NMR spectrum of Zinc-HAFPA Complex.

## Mass spectrum of HAFPA- Zn complex :

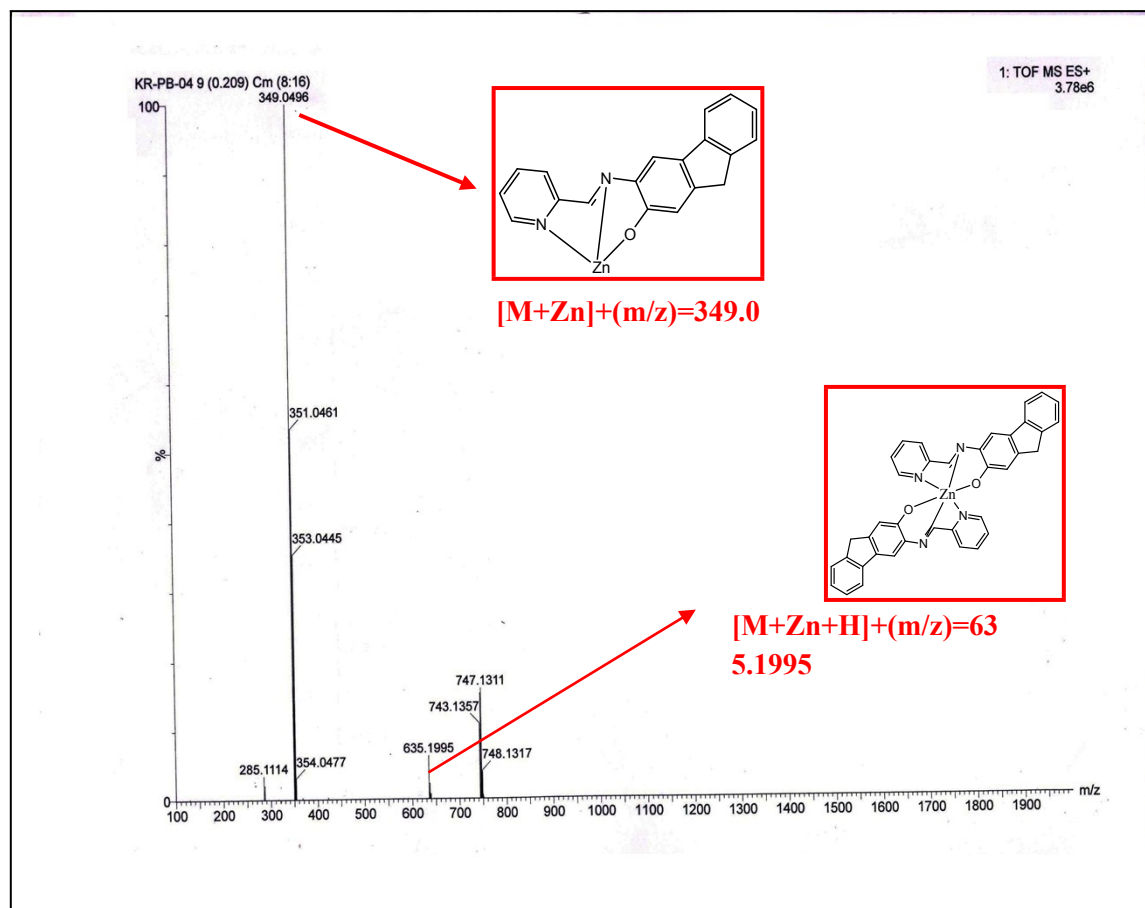

**FigS12.** Mass spectrum of HAFPA- Zn complex.

## Mass spectrum of HAFPA- Cd complex :

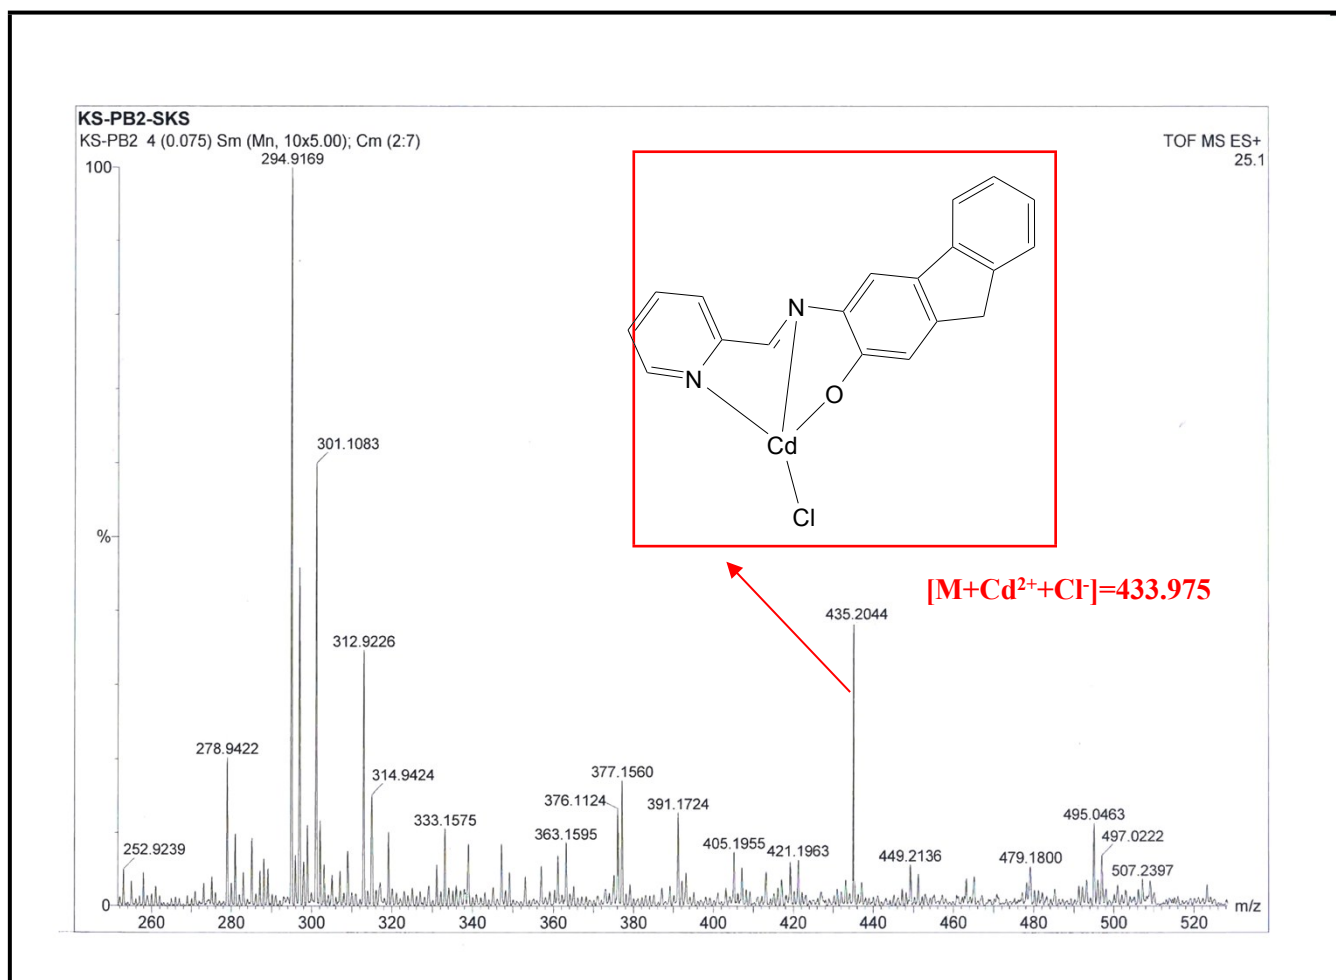

**FigS13.** Mass spectrum of HAFPA- Cd complex.

## **FT-IR Data:**

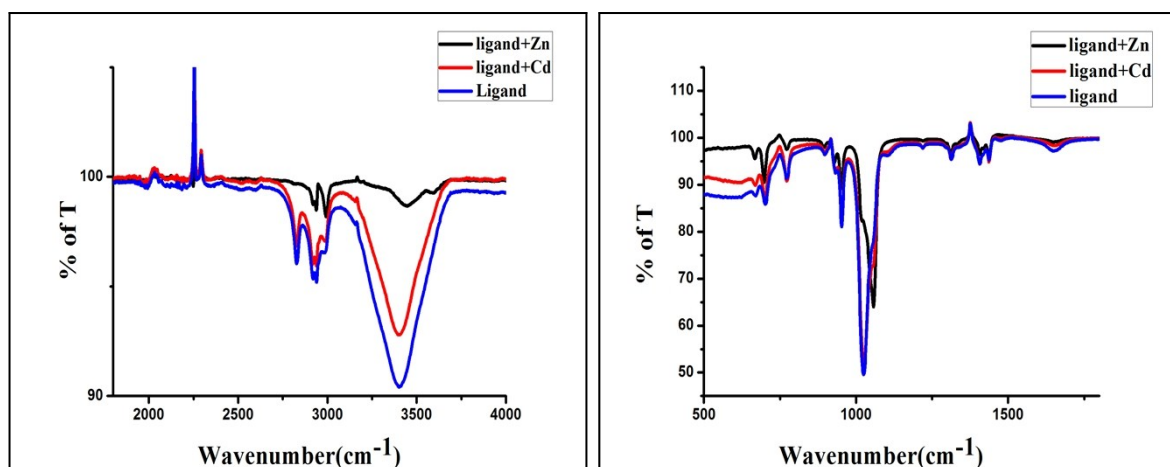

**FigS14** . FT IR spectra of (a) HAFPA and its complex with Zn<sup>2+</sup> and Cd<sup>2+</sup> (b) same in expansion mode.

## **Determination of Association Constant ( $K_a$ ):**

### **By UV-vis method:**

Association constant was calculated according to the Benesi-Hildebrand equation.  $K_a$  was calculated following the equation stated below.

$$1/(A-A_0) = 1/\{K(A_{\max}-A_0) [M^{x+}]^n\} + 1/[A_{\max}-A_0]$$

Here  $A_0$  is the absorbance of receptor in the absence of guest,  $A$  is the absorbance recorded in the presence of added guest,  $A_{\max}$  is absorbance in presence of added  $[M^{x+}]_{\max}$  and  $K_a$  is the association constant, where  $[M^{x+}]$  is  $[Zn^{2+}]$  and  $[Cd^{2+}]$ . The association constant ( $K_a$ ) could be determined from the slope of the straight line of the plot of  $1/(A-A_0)$  against  $1/[M^{x+}]$  and is found to be  $1.34 \times 10^4 \text{ M}^{-1}$  for  $Zn^{2+}$  and  $6.4 \times 10^4 \text{ M}^{-1}$  for  $Cd^{2+}$ .



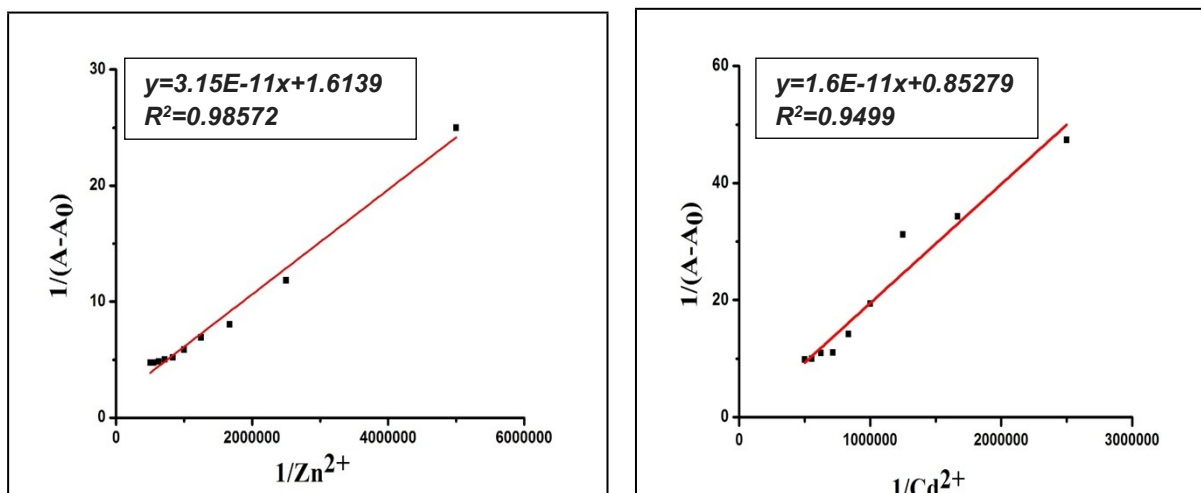

**FigS15.** Benesi-Hildebrand plot from absorption titration data of receptor (10  $\mu$ M) with  $Zn^{2+}$  and  $Cd^{2+}$ .

### By fluorescence method:

The binding constant value of  $Zn^{2+}$  and  $Cd^{2+}$  with receptor has been determined from the emission intensity data following the modified Benesi–Hildebrand equation,

$$1/\Delta I = 1/\Delta I_{\max} + (1/K_a[C])(1/\Delta I_{\max}).$$

Here  $\Delta I = I - I_{\min}$  and  $\Delta I_{\max} = I_{\max} - I_{\min}$ , where  $I_{\min}$ ,  $I$ , and  $I_{\max}$  are the emission intensities of receptor considered in the absence of metal, at an intermediate metal concentration, and at a concentration of complete saturation where  $K$  is the binding constant and  $[C]$  is the  $M^{x+}$  concentration respectively. From the plot of  $[1 / (I - I_{\min})]$  against  $1/M^{x+}$  for receptor, the value of  $K$  has been determined from the slope. The association constant ( $K_a$ ) as determined by fluorescence titration method for the receptor with  $Zn^{2+}$  is found to be  $8.8 \times 10^4 \text{ M}^{-1}$  and  $Cd^{2+}$  is  $8.8 \times 10^4 \text{ M}^{-1}$ .

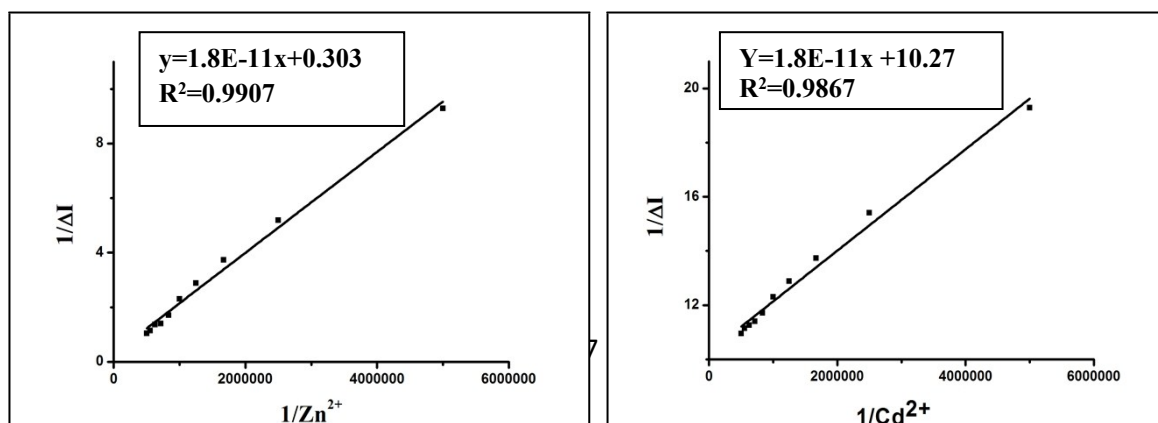

**FigS16.** Benesi–Hildebrand plot from fluorescence titration data of receptor (10  $\mu\text{M}$ ) with  $\text{Zn}^{2+}$  and  $\text{Cd}^{2+}$ .

### Calculation of the detection limit:

The detection limits DL of HAFPA for  $\text{Zn}^{2+}$  and  $\text{Cd}^{2+}$  were determined from the following equation1:

$$\text{DL} = K * \text{Sb1}/S$$

Where  $K = 2$  or  $3$  (we take  $3$  in this case); Sb1 is the standard deviation of the blank solution;  $S$  is the slope of the calibration curve.

From the graph (a) we get slope =  $650461.35$ , and Sb1 value is  $13.442$  and from graph (b) we get slope =  $674715.54$  and Sb1 value is  $11.96$ .

Thus using the formula we get the Detection Limit for  $\text{Zn}^{2+}$  is  $0.61 \mu\text{M}$  i.e. HAFPA can detect  $\text{Zn}^{2+}$  ion in this minimum concentration and Detection Limit for  $\text{Cd}^{2+}$  is  $0.53 \mu\text{M}$ .

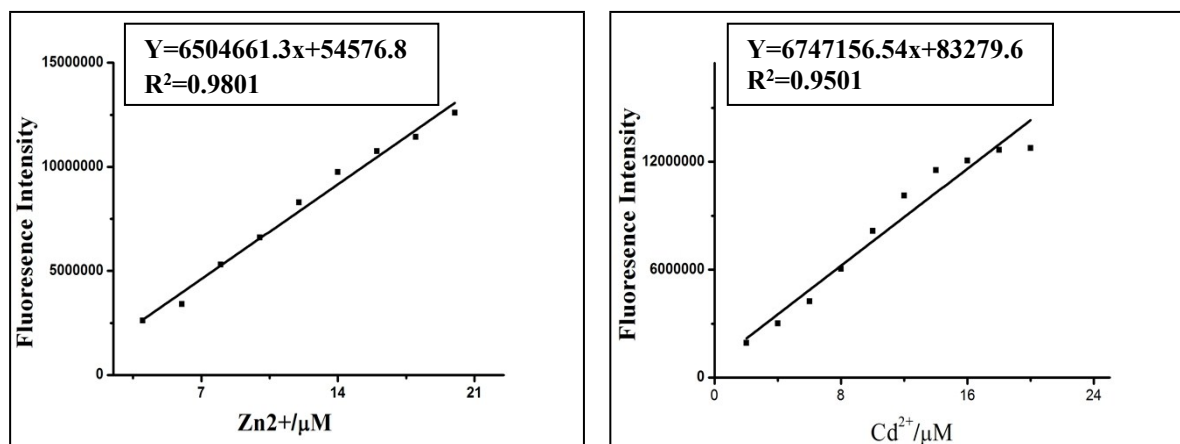

**FigS17.** The linear change of fluorescence intensity as a function of (a)  $[\text{Zn}^{2+}]$  at  $485\text{nm}$  and (b)  $[\text{Cd}^{2+}]$  at  $485 \text{ nm}$ .

## Job's plot by absorbance method:

Stock solution of same concentration of sensor and  $\text{Zn}^{2+}$  and  $\text{Cd}^{2+}$  was prepared in the order of 10  $\mu\text{M}$  in (at 25 °C) at pH 7.4 in HEPES buffer. The absorption spectrum in each case with different host–guest ratio but equal in volume was recorded. Job's plots were drawn by plotting  $\Delta I \cdot X_{\text{host}}$  vs  $X_{\text{host}}$  ( $\Delta I$  = change of intensity of the emission spectrum during titration and  $X_{\text{host}}$  is the mole fraction of the host in each case, respectively).

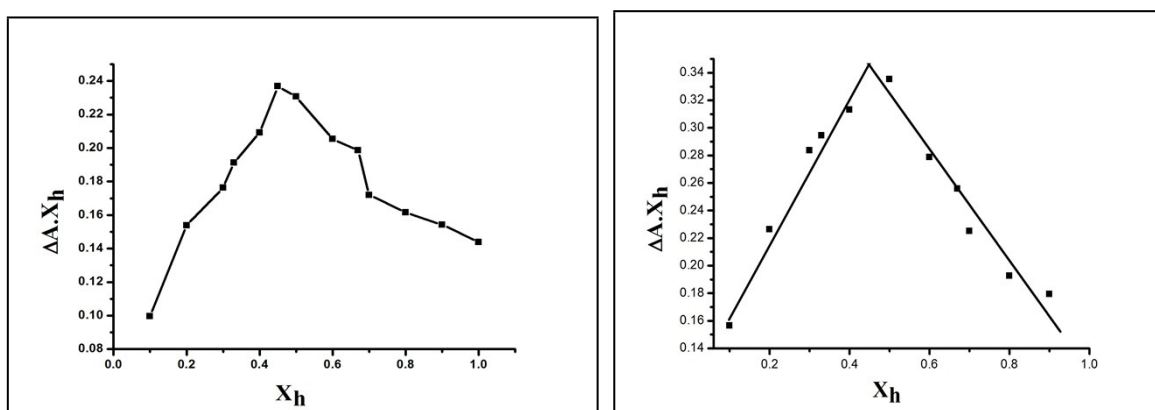

**FigS18.** Jobs plot diagram of HAFPA for a)  $\text{Zn}^{2+}$  and b)  $\text{Cd}^{2+}$  (where  $X_h$  is the mole fraction of host and  $\Delta A$  indicates the change of the absorbance).

The highest peak at 0.45 indicates the formation of both 1:1 and 1:2 complexes for  $\text{Zn}^{2+}$  whereas the peak at 0.5 indicates the formation of only 1:1 complex for  $\text{Cd}^{2+}$ .

## Determination of the fluorescence quantum yield

Here, the quantum yield  $\phi$  was measured using the following equation:

$$\Phi_X = \Phi_S \times (I_x/I_s) \times (A_x/A_s) \times (n_x/n_s)^2$$

where X and S indicate the unknown and standard solution respectively,  $\phi$  = quantum yield, I = area under the emission curve, A = absorbance at the excitation wavelength, and n = index of refraction of the solvent. Here  $\phi$  measurements were performed using quinine sulphate in ethanol as a standard [ $\phi = 0.54$ ] (error ~ 10%).

**Photophysical parameters of the complexes in acetonirile solution at room temperature.Table(S1):**

| Sample            | $\lambda_{\text{max}}$ , nm<br>( $\epsilon$ , $\text{M}^{-1} \text{cm}^{-1}$ ) | $\lambda_{\text{emi}}$ , nm | $\Phi$<br>( $\times 10^{-3}$ ) | $k_{\text{r}}$ , $\text{s}^{-1}$ ( $\times 10^6$ ) | $k_{\text{nr}}$ , $\text{s}^{-1}$ ( $\times 10^8$ ) | $\tau_1$ , ns | $\tau_2$ , ns |
|-------------------|--------------------------------------------------------------------------------|-----------------------------|--------------------------------|----------------------------------------------------|-----------------------------------------------------|---------------|---------------|
| <b>Ligand</b>     | 440(2193371),<br>540(1086772)                                                  | 380                         | 42                             | 9.110                                              | 2.0079                                              | 1.16          | 4.610         |
| <b>Zn Complex</b> | 485(12635645)                                                                  | 485                         | 557                            | 103.91                                             | 8.26                                                | 5.36          | 1.03          |
| <b>Cd Complex</b> | 495(12590869)                                                                  | 495                         | 996                            | 113.2                                              | 12.2                                                | 9.89          | 4.87          |

**UV and Fluorescence spectra of the HAFPA ligand with the gradual addition of  $\text{Cu}^{2+}$  ion:**

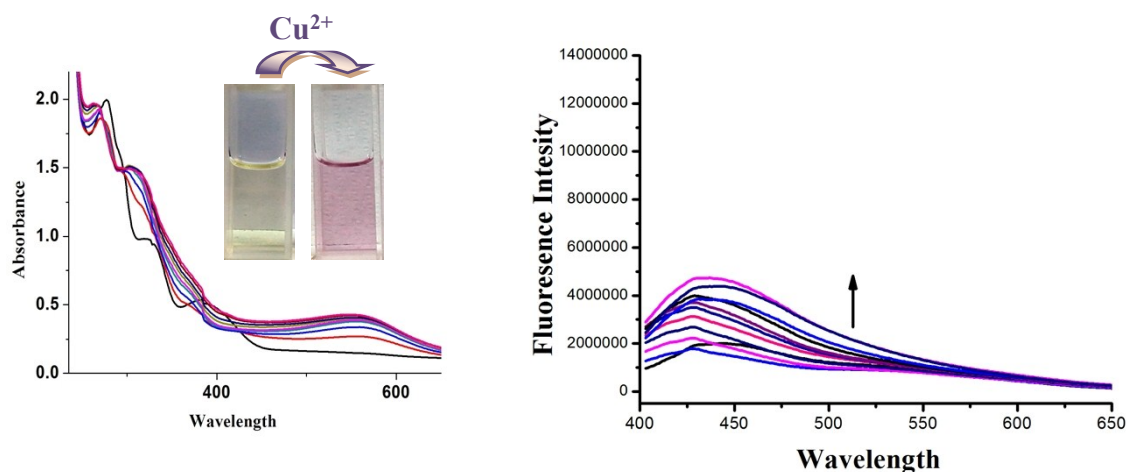

**FigS19.** Absorption and Fluorescence emission spectra of the ligand( $2 \times 10^{-5}$ ) with subsequent addition of  $\text{Cu}^{2+}$ ( $2 \times 10^{-4}$ ).

## Solvent Study:

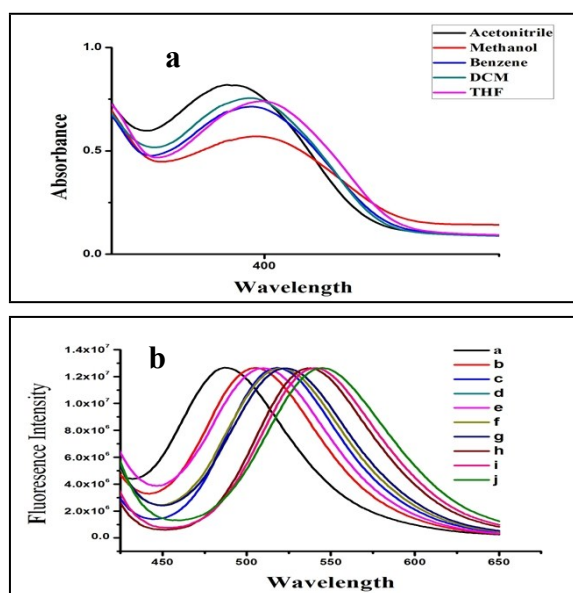

## pH Study:

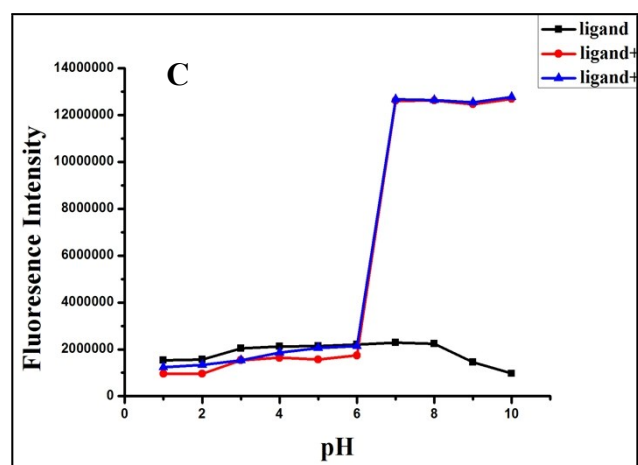

**FigS20.** a) Absorption spectra of the ligand (1x10<sup>-5</sup>) in different solvent as depicted in the picture.

b) Fluorescence spectra of the receptor HAFPA (c = 1x10<sup>-5</sup> M) with 1.0 equiv of zinc (c = 2x10<sup>-4</sup> M) in different proportions of water in CH<sub>3</sub>CN at pH = 7.4: (a) 10% H<sub>2</sub>O (b) 20% H<sub>2</sub>O (c) 30% H<sub>2</sub>O (d) 40% H<sub>2</sub>O (e) 50% H<sub>2</sub>O (f) 60% H<sub>2</sub>O (g) 70% H<sub>2</sub>O (h) 80% H<sub>2</sub>O (i) 90% H<sub>2</sub>O (j) 99.5% H<sub>2</sub>O.

c) Fluorescence intensity of HAFPA (c = 2x10<sup>-5</sup> M) at various pH values in water medium in the absence and presence of Zn<sup>2+</sup> (c = 2.0 x10<sup>-4</sup> M) and Cd<sup>2+</sup> adjusted by using aqueous solutions of 1M HCl and 1M NaOH.

## Reversibility Study:

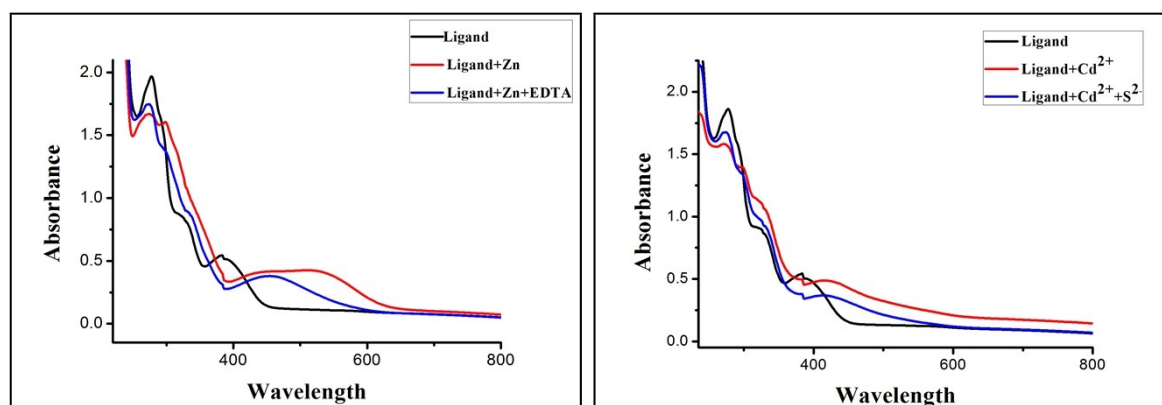

**FigS21.** UV-vis absorption spectra of HAFPA (c = 1.0 x 10<sup>-5</sup> M) in CH<sub>3</sub>CN-HEPES buffer (8/2, v/v, 25 °C) by alternative addition of a) Zn<sup>2+</sup> and EDTA and b) Cd<sup>2+</sup> and S<sup>2-</sup>.

## Calculation of the Association Constant:

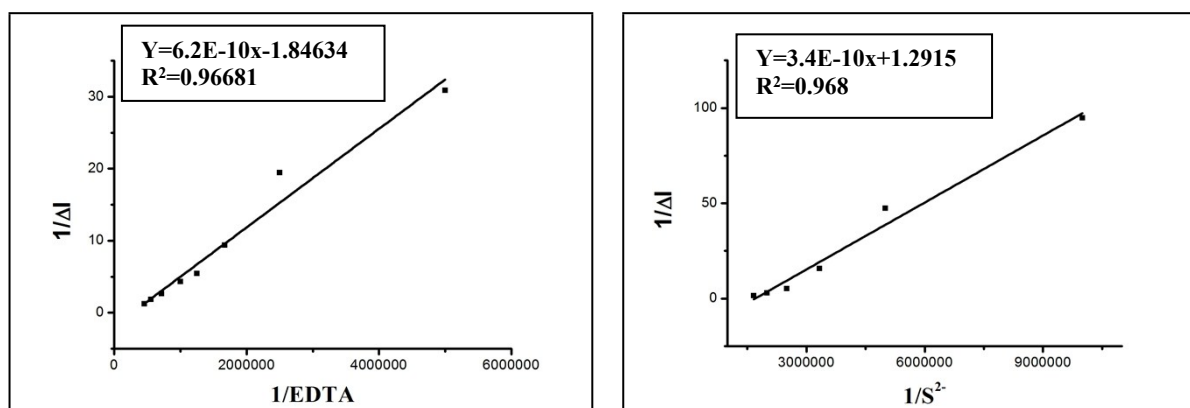

**FigS22.** Determination of association constant of a) HAFPA-Zn receptor and b) HAFPA-Cd receptor for EDTA and  $\text{S}^{2-}$  respectively from fluorescent titration data (For determination of association constant of EDTA and  $\text{S}^{2-}$  with the receptor,  $K_a$  is found to be  $2.41 \times 10^4$  and  $4.41 \times 10^4$  respectively.)

## Calculation of the Detection Limit:

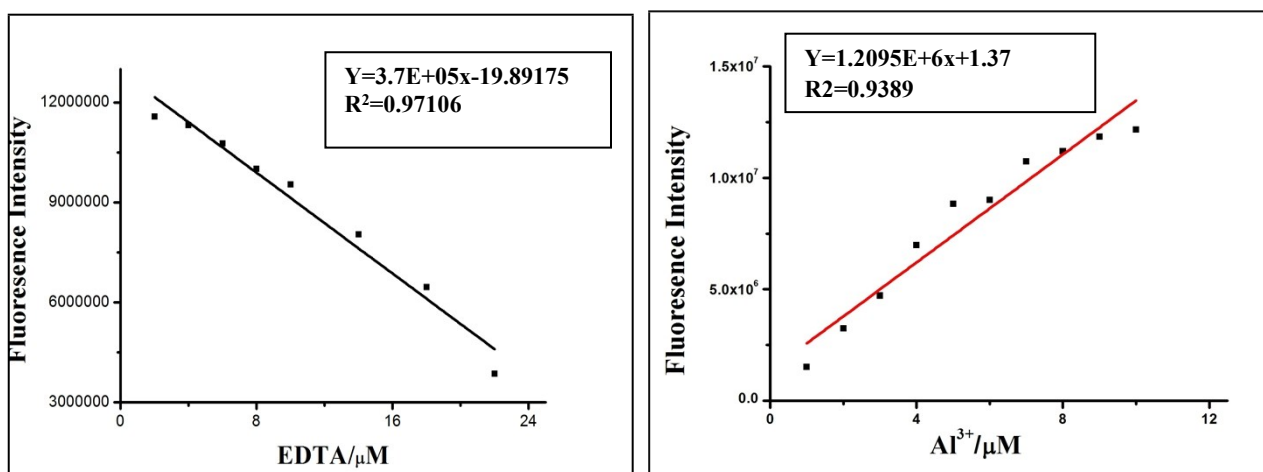

**FigS23.** From the graph (a) we get slope = 378324, and Sb1 value is 11.32 and from graph (b) we get slope = 1209565 and Sb1 value is 26.32. Thus using the formula we get the Detection Limit for EDTA is  $8.97 \times 10^{-5}$  M and Detection Limit for  $\text{S}^{2-}$  is  $6.5 \times 10^{-5}$  M.

## Competition Experiment of Different anions with Receptor :

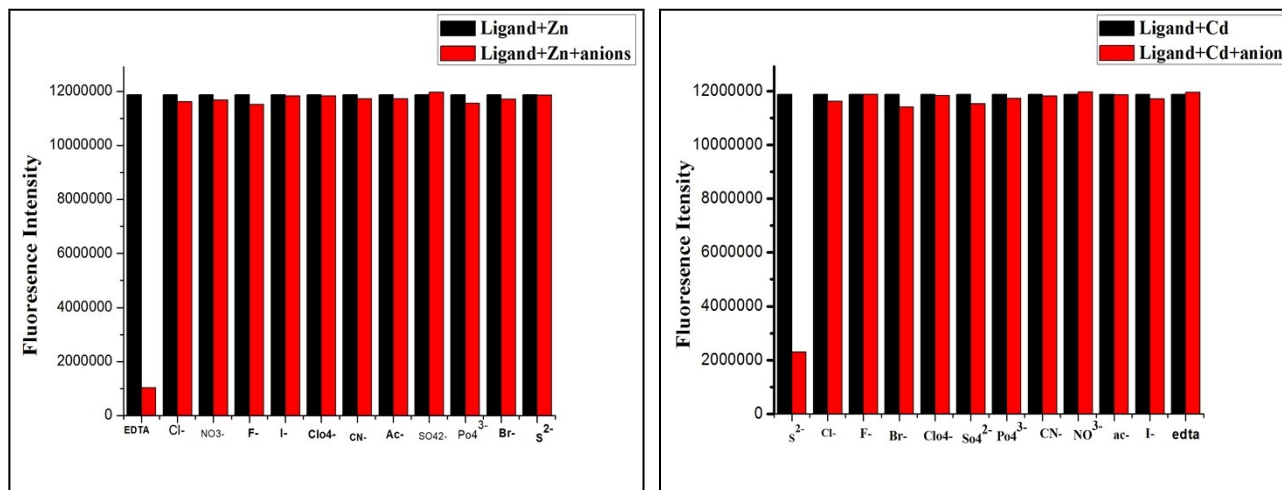

**FigS24.** Anion selectivity profile of the sensor(a) HAFPA–Zn and (b) HAFPA–Cd (Receptor) : (black bar) change of the emission intensity of the ligand with Zn and Cd(Receptor); (red bar) change of the emission intensity of Receptor + 5.0 equiv. of different anions, at 485 nm.

## Calculation of the first order rate constant of HAFPA at different time interval by addition of Zn<sup>2+</sup> and Cd<sup>2+</sup>:

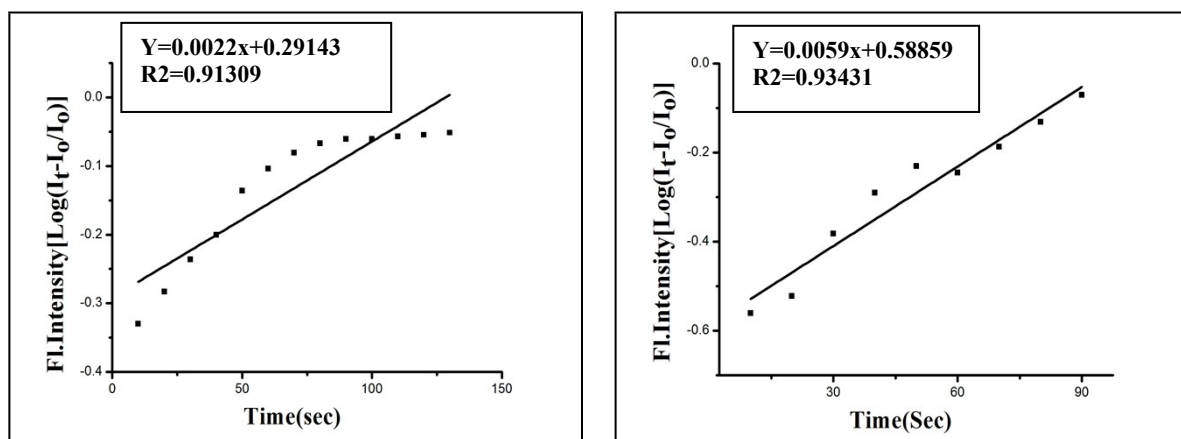

**FigS25.** The first order rate equation by using Time vs. fluorescence plot at 490 nm ( $I_t$  =Maximum intensity,  $I_0$  = Initial Intensity) for a) Zn<sup>2+</sup> and b)Cd<sup>2+</sup>.

From the time vs. fluorescence plot Fig. (a) and (b) at fixed wavelength at 490 nm by using first order rate equation, we get the rate constant  $K = \text{slope} \times 2.303$ . From the plot (a), Slope = 0.0022,  $K = 5.066 \times 10^{-3}$ . (b), Slope = 0.00595,  $K = 1.37 \times 10^{-2}$ .

## Logic Gate:

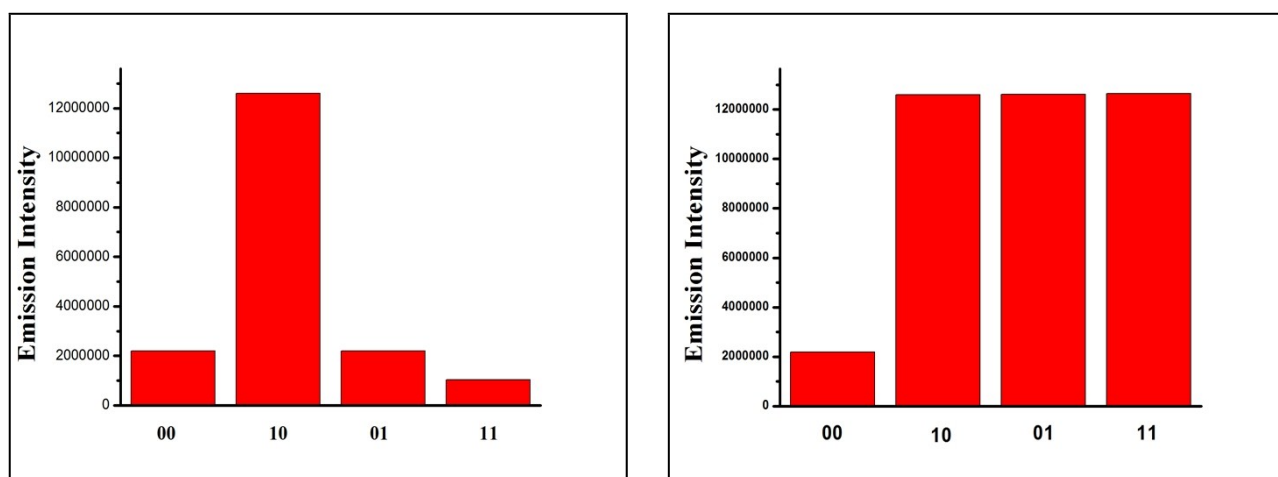

**FigS26.** (a) Fluorescence output of HAFPA ( $c = 1 \times 10^{-5}$  M) at 490 nm ( $\lambda_{\text{ex}} = 380$  nm) in the presence of chemical inputs,  $\text{Zn}^{2+}$  ( $c = 2 \times 10^{-4}$  M) and EDTA ( $c = 2 \times 10^{-4}$  M) at pH = 7.4. (b) Fluorescence output of HAFPA ( $c = 1 \times 10^{-5}$  M) at 490 nm ( $\lambda_{\text{ex}} = 380$  nm) in the presence of chemical inputs,  $\text{Zn}^{2+}$  and  $\text{Cd}^{2+}$  ( $c = 2 \times 10^{-4}$  M) and finally both at pH = 7.4.

Similar experiment is carried with  $\text{Cd}^{2+}$  and  $\text{S}^{2-}$  for the plot (a), it shows the same result.



## Computational Method

Full geometry optimizations were carried out using the density functional theory (DFT) method at the Becke-3-Lee-Yang-Parr(B3LYP) 24 level for the ligand HAFPA and its octahedral  $\text{Zn}^{2+}$  and square planar  $\text{Cd}^{2+}$  complexes. The 6-31+G (d,p) basis set was assigned for all the elements. All calculations were performed with Gaussian03 program with the aid of the Gauss View visualization program.

**TableS2.** Vertical electronic excitations of HAFPA, HAFPA- $\text{Zn}^{2+}$  and HAFPA-  $\text{Cd}^{2+}$  calculated by TDDFT/B3LYP/CPCM method.

| Compoud                         | Excitation                                                                          | Theoretical Wavelength h(nm) | CI                               | $\lambda_{\text{expt.}}$ (nm) |
|---------------------------------|-------------------------------------------------------------------------------------|------------------------------|----------------------------------|-------------------------------|
| HAFPA                           | HOMO-1 $\rightarrow$ LUMO<br>HOMO $\rightarrow$ LUMO+3<br>HOMO-3 $\rightarrow$ LUMO | 398 }<br>384 }<br>376 }      | 0.0490 }<br>0.0005 }<br>0.0014 } | 380                           |
|                                 | HOMO-2 $\rightarrow$ LUMO                                                           | 330 }                        | 0.49851 }                        | 328                           |
| HAFPA-<br>$\text{Cd}^{2+}$      | HOMO $\rightarrow$ LUMO                                                             | 562 }                        | 0.70461 }                        | 480                           |
|                                 | HOMO $\rightarrow$ LUMO+1<br>HOMO-1 $\rightarrow$ LUMO                              | 363 }<br>358 }               | 0.0159 }<br>0.56239 }            | 385                           |
|                                 | HOMO $\rightarrow$ LUMO+2<br>HOMO-2 $\rightarrow$ LUMO                              | 320 }<br>318 }               | 0.46848 }<br>0.5304 }            | 324                           |
| HAFPA-<br>$\text{Zn}^{2+}(2:1)$ | HOMO-1 $\rightarrow$ LUMO+1<br>HOMO-1 $\rightarrow$ LUMO                            | 552 }<br>553 }               | 0.65904 }<br>0.64670 }           | 500                           |

|               |                                                                                           |                                                   |                                                                   |                              |
|---------------|-------------------------------------------------------------------------------------------|---------------------------------------------------|-------------------------------------------------------------------|------------------------------|
|               | HOMO → LUMO+2<br>HOMO → LUMO+3<br><br>HOMO-2 → LUMO+2                                     | 371 }<br>369 }<br><br>266 }                       | 0.69929 }<br>0.69304 }<br><br>0.12290 }                           | 385<br><br><br>275           |
| HAFPA-Zn(1:1) | HOMO → LUMO<br>HOMO-1 → LUMO<br>HOMO → LUMO+2<br><br>HOMO-3 → LUMO<br><br>HOMO-2 → LUMO+3 | 582 }<br>369 }<br>358 }<br><br>331 }<br><br>282 } | 0.70367 }<br>0.65227 }<br>0.65045 }<br><br>0.69055 }<br>0.69033 } | 500<br>380<br><br>320<br>275 |

**TableS3.** Calculated Triplet excited state of Zn and Cd Complex in Acetonitrile based on the lowest lying triplet state geometry.

| Complex      | Excitation | Composition                 | E(eV)<br>( $\lambda_{\text{theo}}$<br>nm) | CI      | $\lambda_{\text{exp}}$<br>(nm) |
|--------------|------------|-----------------------------|-------------------------------------------|---------|--------------------------------|
| Zn-<br>HAFPA | 1(380nm)   | HOMO-1 $\rightarrow$ LUMO+1 | 514                                       | 0.49696 | 485                            |
|              |            | HOMO $\rightarrow$ LUMO+3   | 484                                       | 0.83590 |                                |
|              |            | HOMO-1 $\rightarrow$ LUMO   | 480                                       | 0.8190  |                                |
|              |            | HOMO-1 $\rightarrow$ LUMO+2 | 442                                       | 0.57066 | 440                            |
| Cd-<br>HAFPA | 1(380nm)   | HOMO $\rightarrow$ LUMO+3   | 488                                       | 0.66255 | 490                            |
|              |            | HOMO-3 $\rightarrow$ LUMO   | 485                                       | 0.52357 |                                |

## Theoretical Spectrum

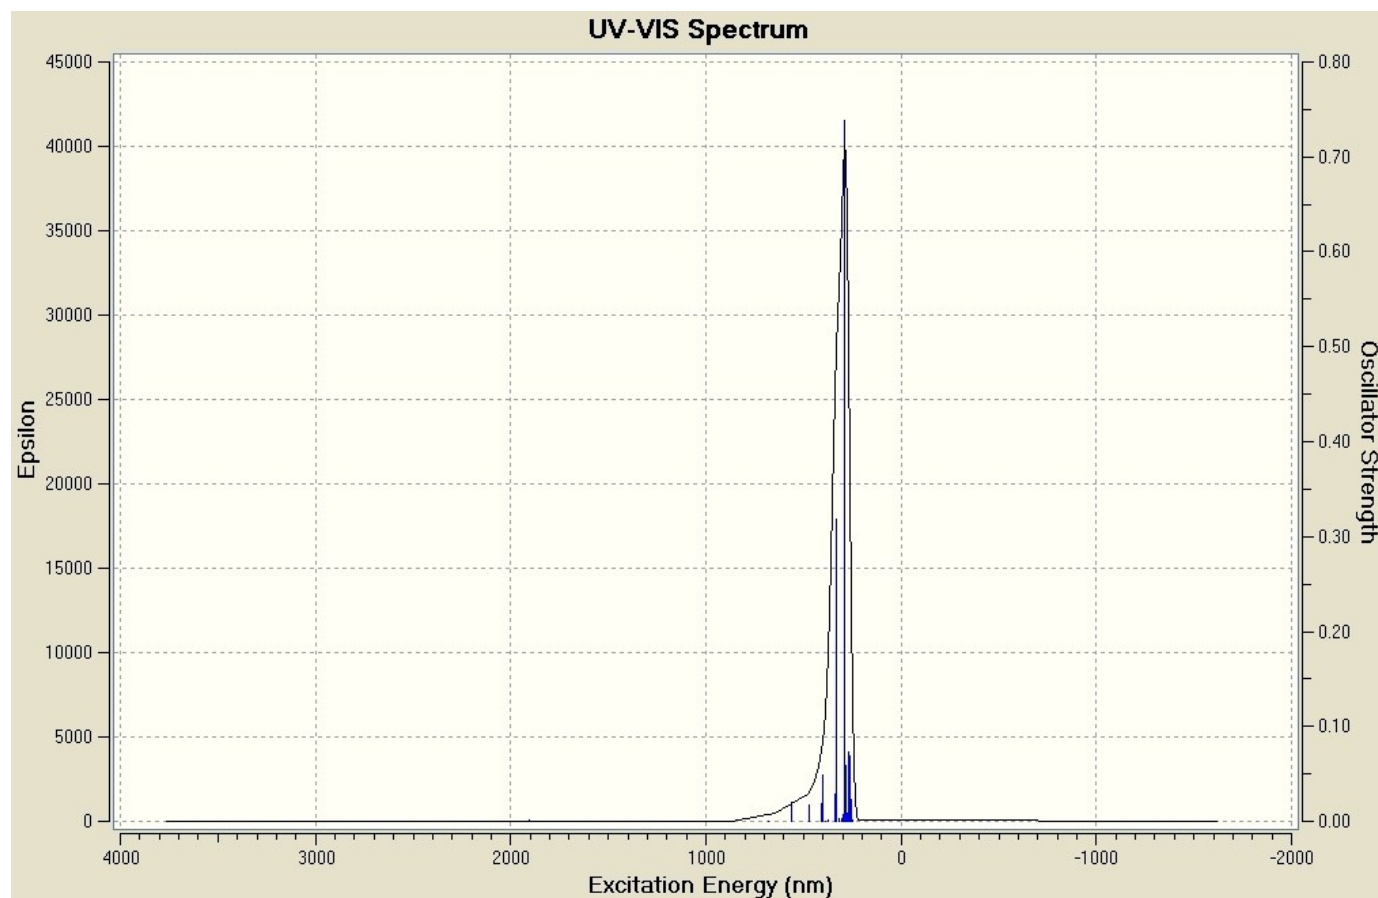

**FigS27.** The theoretical UV-Vis spectra for HAFPA.

a)

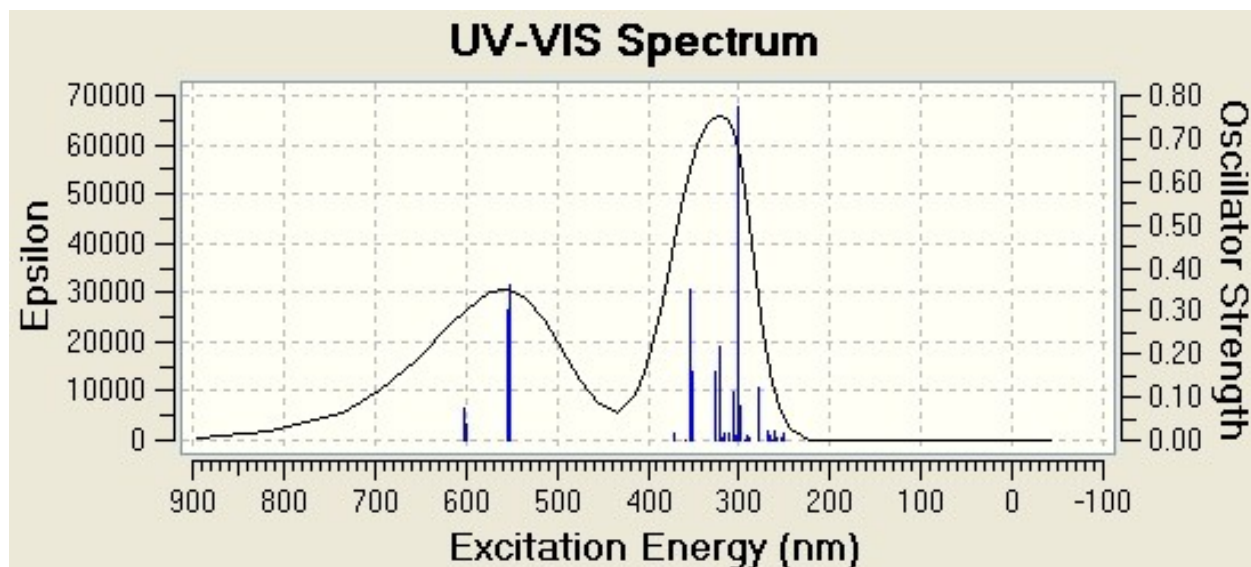

b)

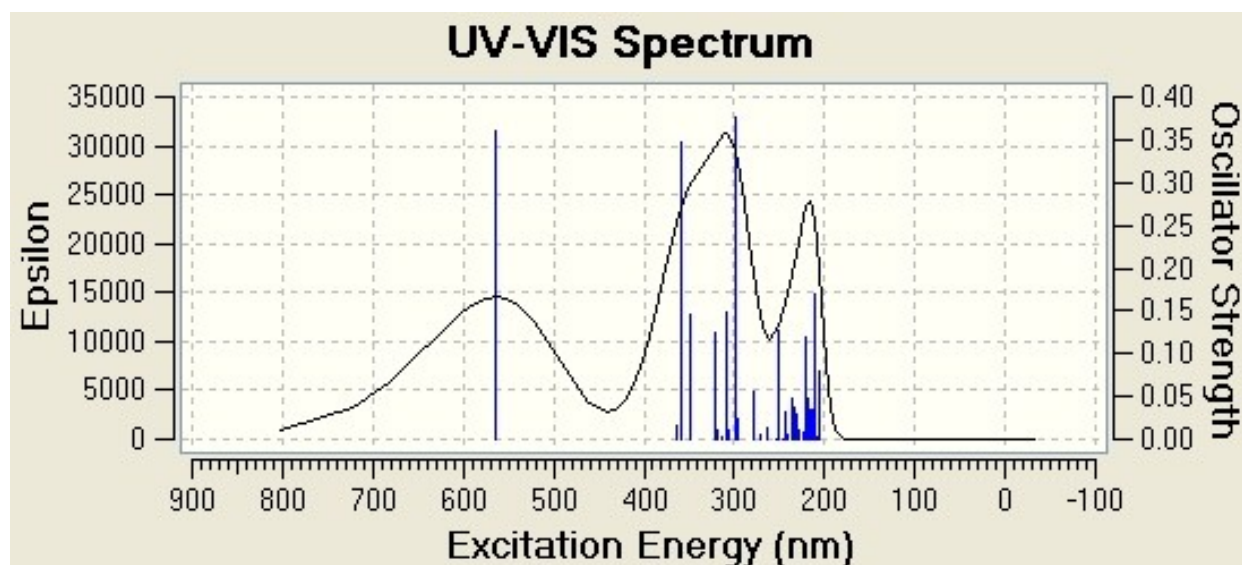

c)

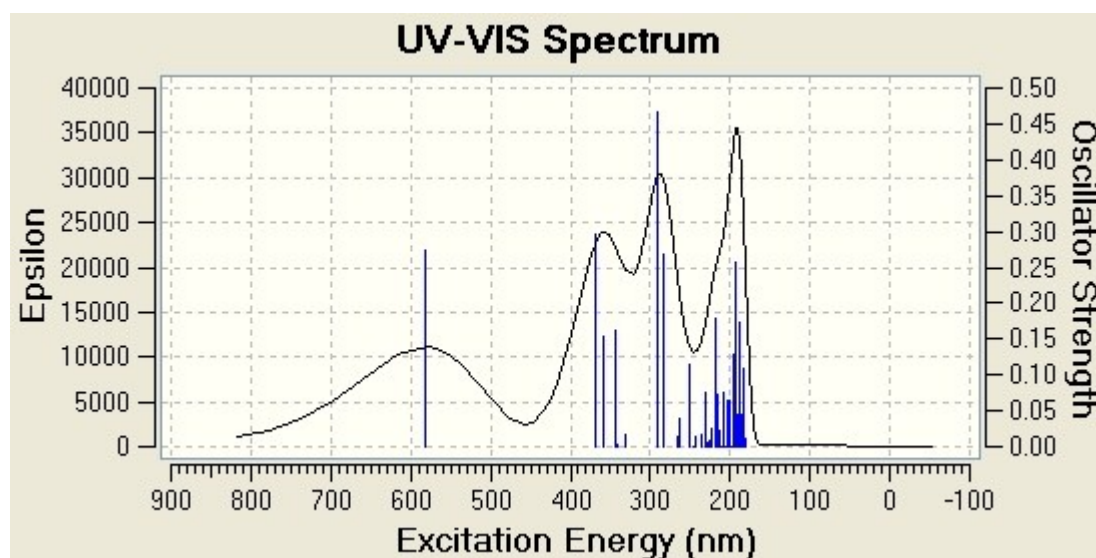

**FigS28.** The theoretical UV-Vis spectra for a)HAFPA-Zn (2:1)complex, b)HAFPA-Cd complex and c)HAFPA-Zn(1:1).

## NMR Study over a longer period of time

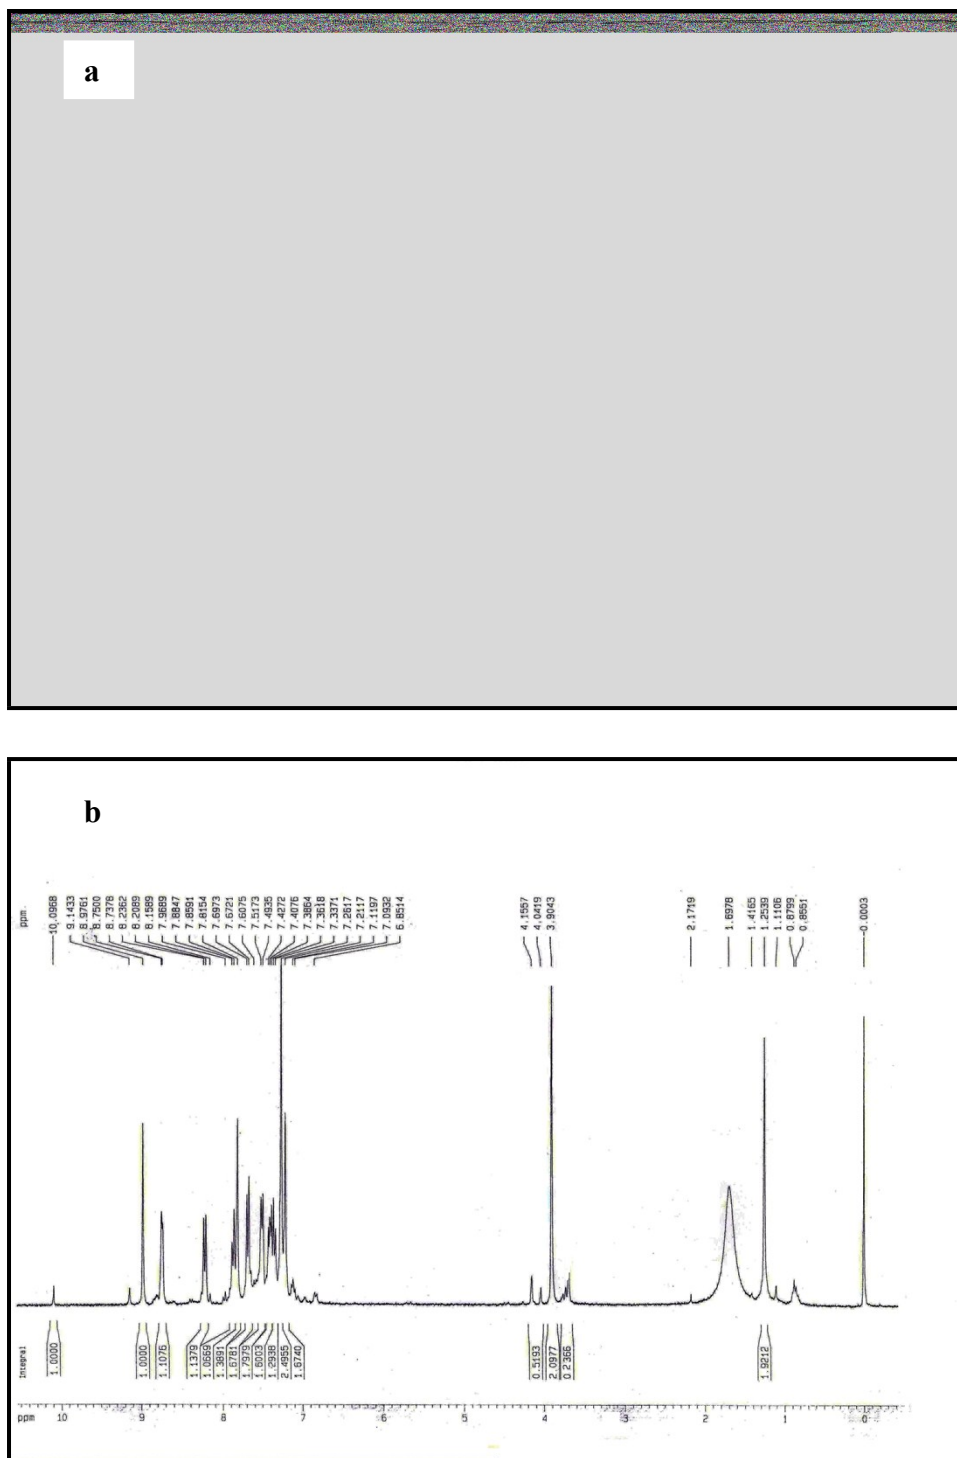

**FigS29.** (a)  $^1\text{H}$  NMR taken after 1hr (b)  $^1\text{H}$  NMR taken after 24hr.

**Table S4.** Comparison of Zinc and Cadmium metal sensing aptitude of some reported chemosensor.

| References                                                                                                                      | Experimental Medium                                           | Sensed Metal ion with LOD                                                                                                                | In vivo application      |
|---------------------------------------------------------------------------------------------------------------------------------|---------------------------------------------------------------|------------------------------------------------------------------------------------------------------------------------------------------|--------------------------|
| 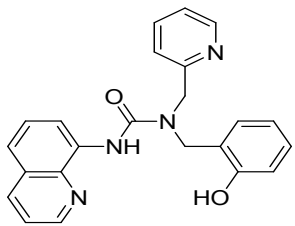<br>Dalton Trans., 2013, 42, 15514             | Acetonitrile                                                  | Zn <sup>2+</sup> sensor with <b>LOD</b> - 66nM<br><br>Cd <sup>2+</sup> sensor with <b>LOD</b> - 120nM                                    | Al <sup>3+</sup> imaging |
| <br>RSC Adv,2015,5,63338-63344                 | MeOH-H <sub>2</sub> O(99:1)                                   | Al <sup>3+</sup> sensor with <b>LOD</b> - 0.7μM                                                                                          | -                        |
| <br>RSC Adv,2015,5,33878                     | 0.1 M water – methanol, 97.5 :2.5 ,v/v, pH=7.4)               | Zn <sup>2+</sup> sensor with <b>LOD</b> 0.1nM                                                                                            | Zn <sup>2+</sup> imaging |
| <br>Sensors and Actuators B202(2014)788–794  | MeOH /aqueous HEPES Buffer (5mM, pH7.3; 7:3 v/v).             | Zn <sup>2+</sup> sensor with <b>LOD</b> - 6.5×10 <sup>−7</sup> M<br><br>Cd <sup>2+</sup> sensor with <b>LOD</b> - 2.1×10 <sup>−6</sup> M |                          |
| <br>Analytica Chimica Acta, 829(2014), 54-59 | Ethanol: H <sub>2</sub> O= 9:1 in 10mM HEPES buffer at pH=7.0 | Al <sup>3+</sup> sensor with <b>LOD</b> 0.29μM                                                                                           | Al <sup>3+</sup> imaging |
